# Supplementary material for: Predictors of clinical outcome in a national hospitalised cohort across both waves of the influenza A/H1N1 pandemic 2009–2010 in the UK
Source: PubMed Central journal article supplement — Thorax. 2012 Mar 10;67(8):709–17. doi: 10.1136/thoraxjnl-2011-200266 (PMC3402749; doi:10.1136/thoraxjnl-2011-200266), 2012-03-10
Supplement: thoraxjnl-2011-200266-s2.pdf [file thoraxjnl-2011-200266-s2.pdf]

**Supplementary Table 1:** Vital signs on admission, initial investigations and proportion of abnormal results in patients hospitalised with pandemic H1N1 infection during the 2009/10 pandemic (n=1520).

| Observations                            | n    | Mean value | Range (inter-quartile range) |             | Level of abnormality | %    |
|-----------------------------------------|------|------------|------------------------------|-------------|----------------------|------|
| Temperature (°C)                        |      |            |                              |             |                      |      |
| Children                                | 433  | 37.9       | 23.2-41.4                    | 37.0-38.8   | 37.1 to 37.9°C       | 25.6 |
|                                         |      |            |                              |             | ≥ 38.0°C             | 38.9 |
| Adults                                  | 962  | 37.8       | 26.1-40.8                    | 37.0-38.6   | 37.1 to 37.9°C       | 30.1 |
|                                         |      |            |                              |             | ≥ 38.0°C             | 36.9 |
| Pulse (beats/min)                       |      |            |                              |             |                      |      |
| Children                                | 434  | 135.0      | 24.0-240.0                   | 117.0-156.0 | >normal*             | 10.3 |
| Adults                                  | 964  | 104.0      | 43.0-200.0                   | 90.0-118.0  | >85                  | 75.7 |
| Respiratory rate(breaths/min)           |      |            |                              |             |                      |      |
| Children                                | 408  | 34.8       | 8.0-100.0                    | 24.0-40.0   | >normal*             | 49.4 |
| Adults                                  | 909  | 22.3       | 6.0-110.0                    | 18.0-25.0   | >30                  | 10.2 |
| Systolic BP (mm Hg)                     |      |            |                              |             |                      |      |
| Children                                | 166  | 106.0      | 69.0-168.0                   | 97.0-117.0  | <normal*             | 27.7 |
| Adults                                  | 952  | 123.0      | 60.0-209.0                   | 109.0-136.0 | <110                 | 28.4 |
| Diastolic BP (mm Hg)                    |      |            |                              |             |                      |      |
| Children                                | 166  | 62.0       | 33.0-145.0                   | 53.0-69.0   | <normal*             | 32.3 |
| Adults                                  | 952  | 71.0       | 32.0-124.0                   | 62.0-80.0   | <65                  | 33.1 |
| C-reactive protein (mg/L)               |      |            |                              |             |                      |      |
| Children                                | 222  | 37.0       | 0.6-527.0                    | 5.0-35.0    | 31 to 99             | 8.7  |
|                                         |      |            |                              |             | ≥100                 | 4.4  |
| Adults                                  | 595  | 76.0       | 1.4-480.0                    | 20.0-97.0   | 31 to 99             | 21.2 |
|                                         |      |            |                              |             | ≥100                 | 13.6 |
| White cell count (x10 <sup>9</sup> /L)  |      |            |                              |             |                      |      |
| Adults and children                     | 1095 | 9.04       | 0.1-133.0                    | 5.5-10.2    | >11.0                | 15.1 |
| Creatinine kinase (IU/L)                |      |            |                              |             |                      |      |
| Children                                | 259  | 47.1       | 2.0-794.0                    | 29.0-56.0   | >195                 | 0.2  |
| Adults                                  | 815  | 92.0       | 1.0-1090.0                   | 63.0-96.0   | >200                 | 4.2  |
| Urea (µmol/L)                           |      |            |                              |             |                      |      |
| Children                                | 263  | 5.7        | 0.6-106.0                    | 3.0-5.0     | >6.4                 | 6.4  |
| Adults                                  | 821  | 7.5        | 0.8-315.0                    | 3.1-6.1     | >6.7                 | 16.2 |
| Alanine transaminase (IU/L)             |      |            |                              |             |                      |      |
| Children                                | 170  | 48.7       | 1.0-1644.0                   | 14.0-34.0   | >40                  | 6.4  |
| Adults                                  | 555  | 45.4       | 1.0-3509.0                   | 18.0-40.0   | >35                  | 16.6 |
| SpO <sub>2</sub> (% breathing room air) |      |            |                              |             |                      |      |
| Children                                | 281  | 96.0       | 60.0-100.0                   | 94.0-99.0   | <94%                 | 20.0 |
| Adults                                  | 712  | 94.8       | 6.00-10.0                    | 94.0-98.0   | <94%                 | 27.0 |

\* See Methods for derivation of abnormal values in children

**Supplementary Table 2:** Multivariable analysis: Patient characteristics independently predictive of severe outcome in pandemic influenza during the 2009/10 pandemic, with age excluded from model (n=1520).

| Patient characteristic                       | Adjusted OR | 95% CI           | P value          |
|----------------------------------------------|-------------|------------------|------------------|
| <i>Underlying comorbidities</i>              |             |                  |                  |
| Asthma                                       | <b>0.50</b> | <b>0.35-0.71</b> | <b>&lt;0.001</b> |
| Cardiovascular disease                       | <b>1.65</b> | <b>1.14-2.39</b> | <b>0.007</b>     |
| Other lung disease excluding COPD and asthma | <b>2.35</b> | <b>1.14-4.84</b> | <b>0.020</b>     |
| Neurological disorders                       | <b>2.53</b> | <b>1.58-4.05</b> | <b>&lt;0.001</b> |
| Obesity                                      | <b>2.35</b> | <b>1.25-4.40</b> | <b>0.008</b>     |

[Supplementary Figure 1: Dates of onset of influenza like symptoms for patients hospitalised with pandemic H1N1 infection during the 2009/10 pandemic](#)
